# Supplementary material for: Broadened optical absorption, enhanced photoelectric conversion and ultrafast carrier dynamics of N, P co-doped carbon dots
Source: Royal Society of Chemistry journal article supplement (doi:10.1039/d2nr00211f), 2022-01-01
Supplement: d2nr00211f1.pdf [file d2nr00211f1.pdf]

## Supplementary Information

### **Broadened Optical Absorption, Enhanced Photoelectric Conversion and Ultrafast Carrier Dynamics of N, P Co-Doped Carbon Dots**

Yatao Pan,<sup>a</sup> Zhongran Wei,<sup>b</sup> Mengdi Ma,<sup>a</sup> Xin Zhang,<sup>b</sup> Zhen Chi,<sup>a</sup> Yulu He,<sup>a</sup> Xiaojuan Wang,<sup>a</sup> Xia Ran<sup>b,\*</sup> and Lijun Guo<sup>a,\*</sup>

<sup>a</sup>School of Physics and Electronics, International Joint Research Laboratory of New Energy Materials and Devices of Henan Province, Henan University, Kaifeng 475004, China.

<sup>b</sup>Academy for Advanced Interdisciplinary Studies, State Key Laboratory of Crop Stress Adaptation and Improvement, School of Physics and Electronics, Henan University, Kaifeng 475004, China.

\*E-mail address: ranxia@henu.edu.cn (Xia Ran) and juneguo@henu.edu.cn (Lijun Guo).

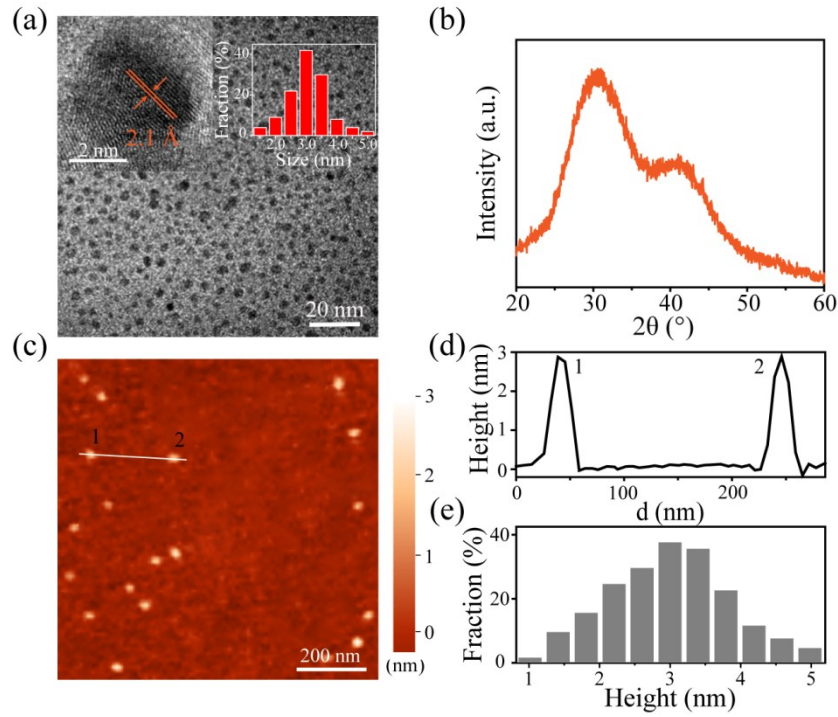

**Figure S1.** (a) TEM image of N-CDs. Inset shows the HRTEM image displaying the crystalline lattice planes of an individual N-CDs (left) and the size distribution histogram (right). (b) XRD patterns of N-CDs. (c) AFM image, (d) height profile along the white line and (e) height distribution of N-CDs.

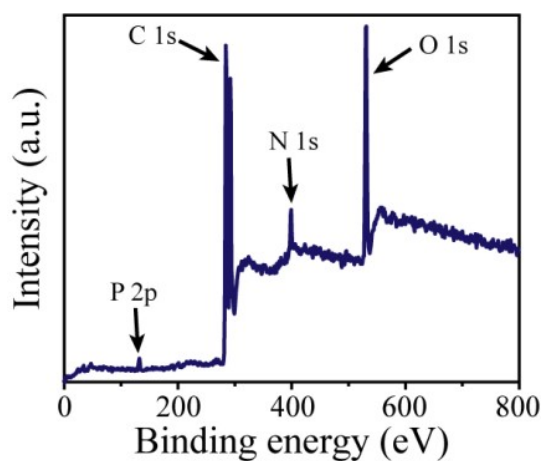

**Figure S2.** XPS spectrum of N, P-CDs (50 % H<sub>3</sub>PO<sub>4</sub>).

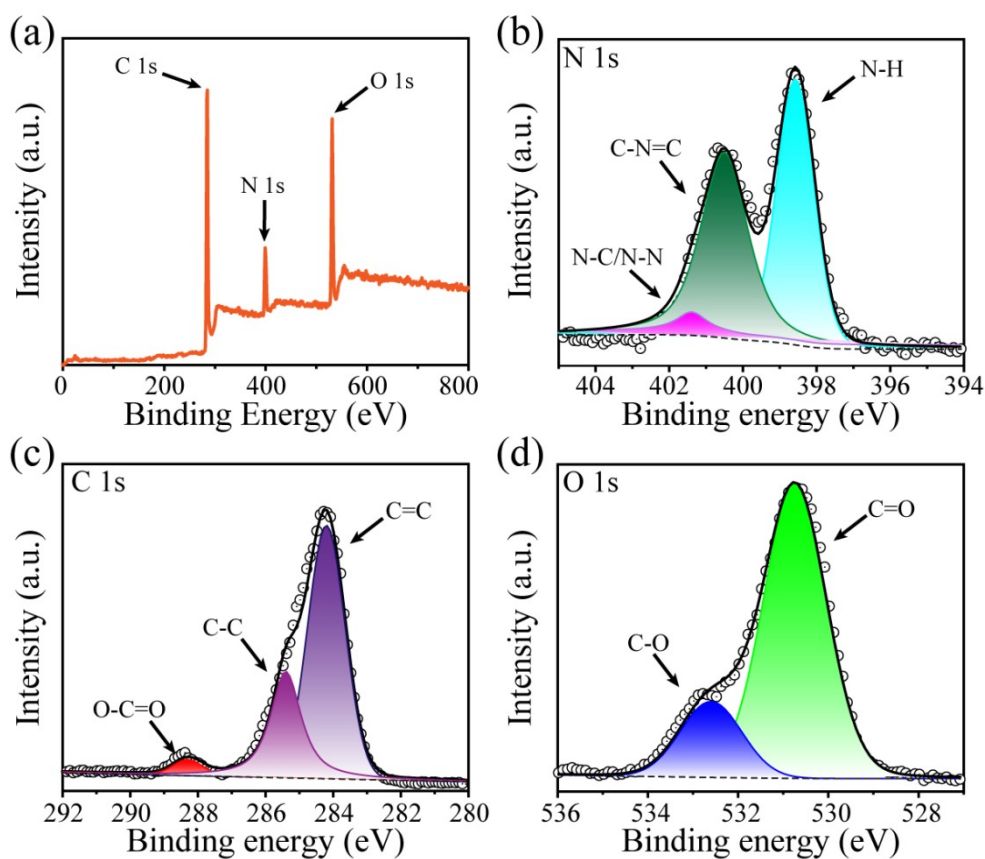

**Figure S3.** (a) Full XPS spectrum of N-CDs. High-resolution XPS spectra of (b) N 1s, (c) C 1s and (d) O 1s of N-CDs.

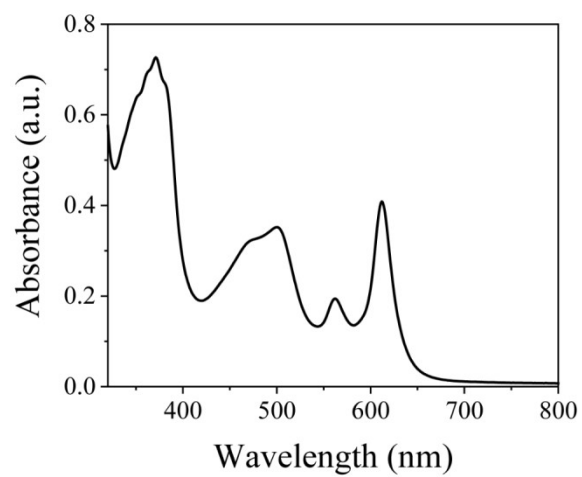

**Figure S4.** UV-vis spectrum of N, P-CDs (100% H<sub>3</sub>PO<sub>4</sub>).

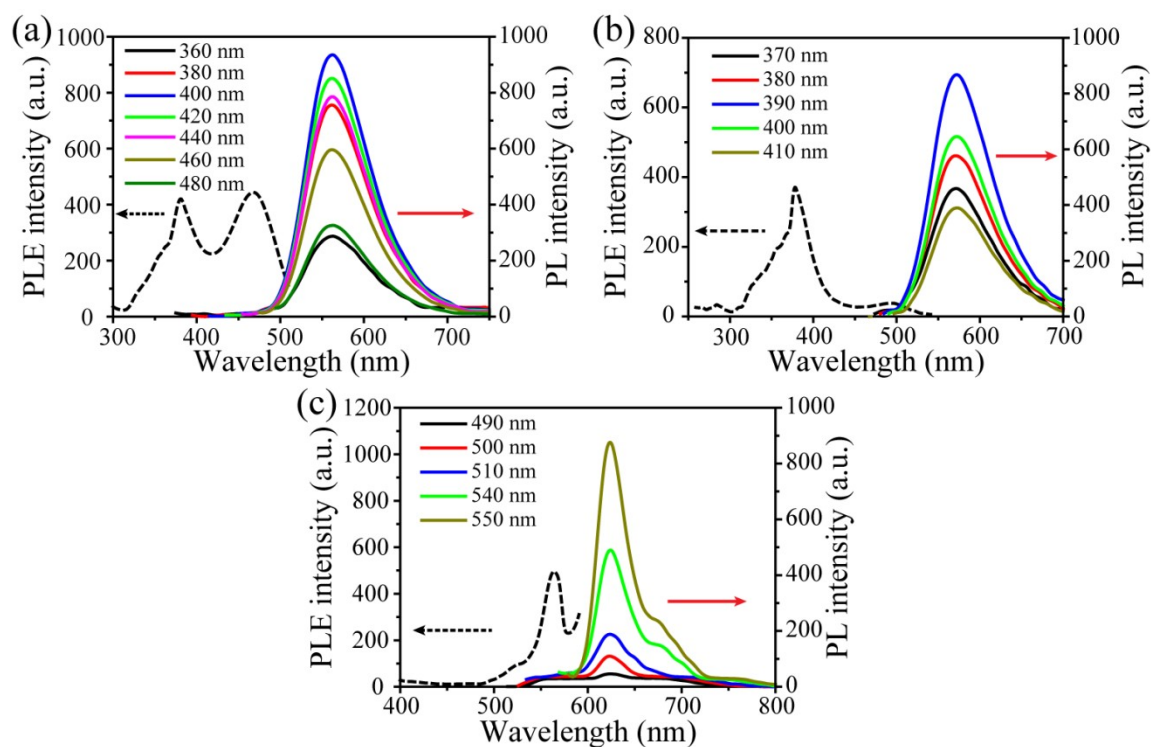

**Figure S5.** Excitation spectra (dashed line) and emission spectra (solid line) of (a) N-CDs, (b) N, P-CDs (5% H<sub>3</sub>PO<sub>4</sub>) and (c) N, P-CDs (15% H<sub>3</sub>PO<sub>4</sub>) under different excitation wavelengths.

**Table S1.** The PL quantum yields (QY) of N-CDs with different excitation wavelengths.

| Wavelength (nm) | 360 | 380 | 400 | 420 | 440 | 460 | 480 |
|-----------------|-----|-----|-----|-----|-----|-----|-----|
| QY (%)          | 6.5 | 7.0 | 6.1 | 5.8 | 6.1 | 6.4 | 7.0 |

**Table S2.** The PL quantum yields of N, P-CDs (50% H<sub>3</sub>PO<sub>4</sub>) with different excitation wavelengths.

| Wavelength (nm) | 490 | 500  | 510  | 520  | 530  | 540  | 550  |
|-----------------|-----|------|------|------|------|------|------|
| QY (%)          | 8.6 | 10.5 | 11.6 | 12.0 | 11.4 | 11.6 | 10.4 |

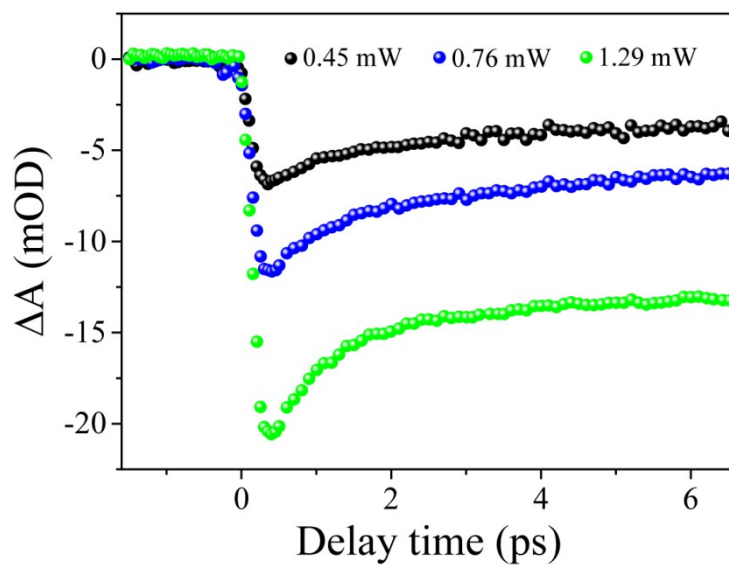

**Figure S6.** Kinetic traces around 600 nm of N, P-CDs (50 % H<sub>3</sub>PO<sub>4</sub>) with different excitation power.

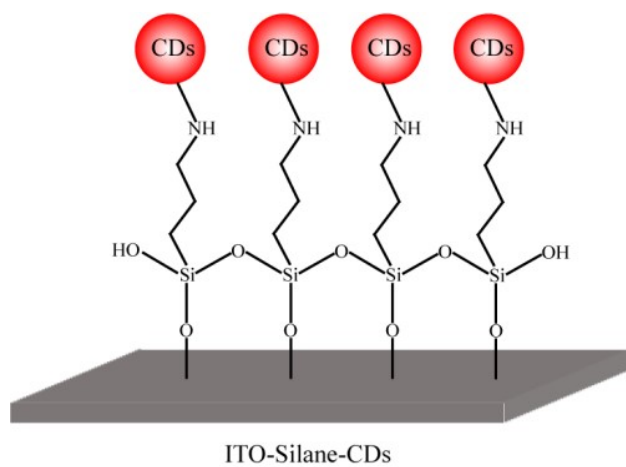

**Scheme S1.** Schematic illustration of ITO-Silane-CDs.

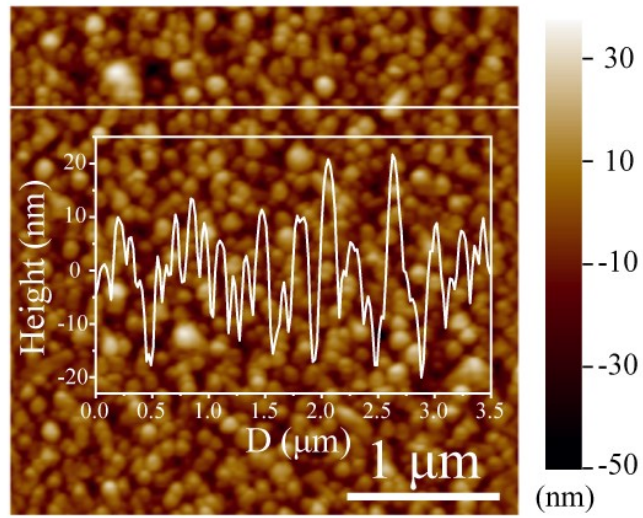

**Figure S7.** AFM image of bare ITO.
